# Supplementary material for: Recurrent chromosome reshuffling and the evolution of neo-sex chromosomes in parrots
Source: PubMed Central journal article supplement (PMC8854603; doi:10.1038/s41467-022-28585-1), 2022-02-17
Supplement: 41467_2022_28585_MOESM1_ESM.pdf [file 41467_2022_28585_MOESM1_ESM.pdf]

Note: Throughout this supplementary file, illustrations were reproduced by permission of Lynx Edicions.

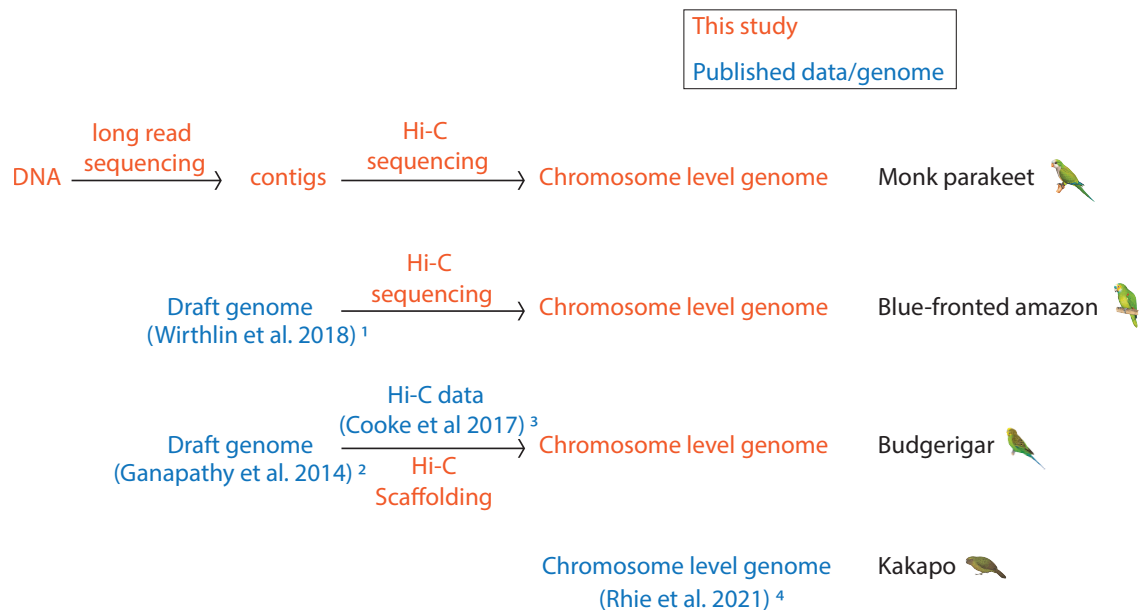

**Supplementary Fig. S1 The source of four chromosome-level of parrot genomes.**

We produced long-read sequencing data for monk parakeet, and Hi-C data for monk parakeet and blue-fronted amazon. We used the public available Hi-C data (Cooke et al. 2017)<sup>3</sup> of budgerigar to generate a chromosome-level assembly using the same pipeline applied to monk parakeet and blue-fronted amazon.

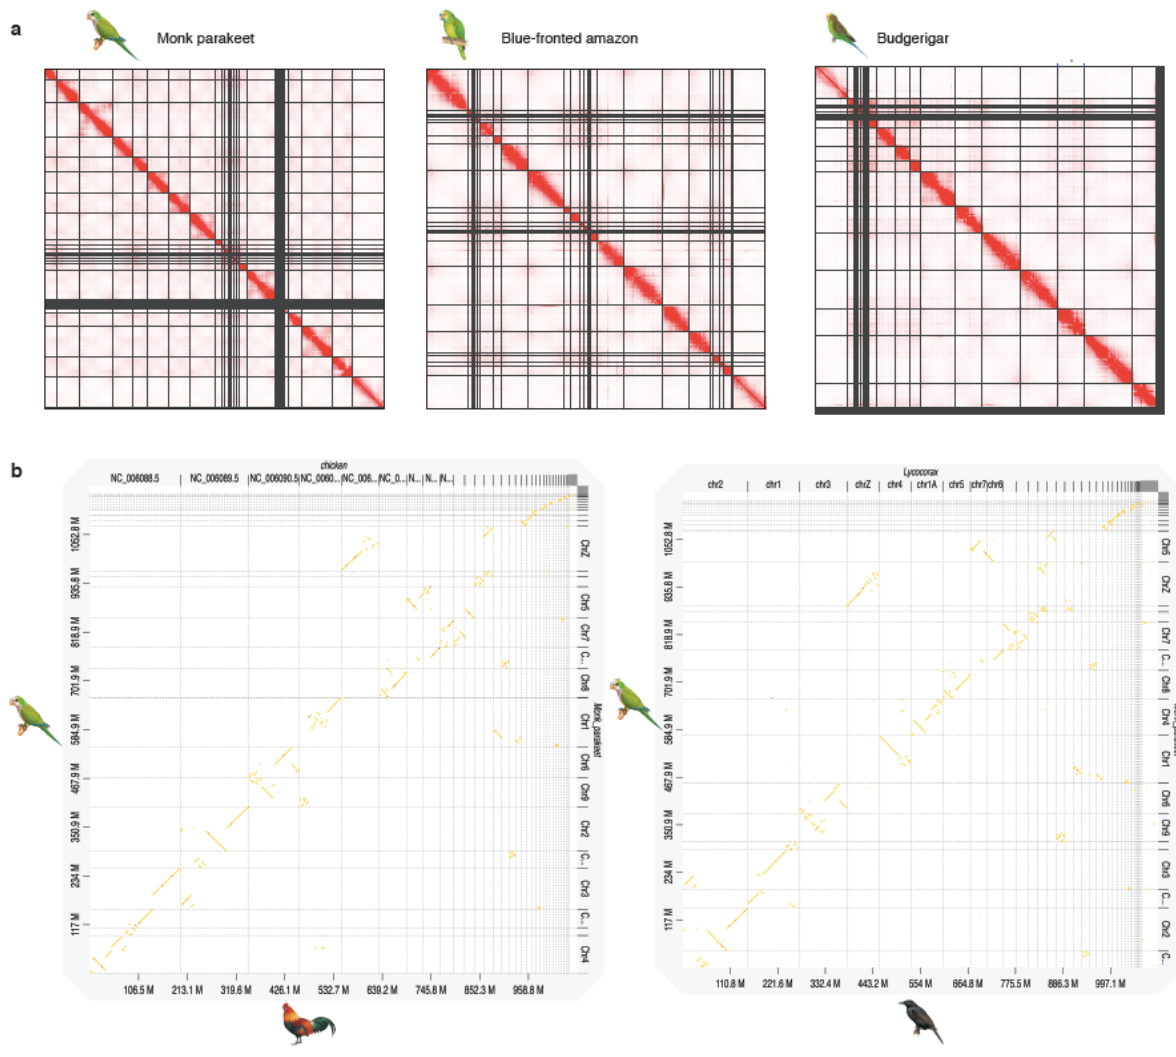

**Supplementary Fig. S2 Hi-C-based chromosome-level assemblies of three parrot genomes.** **a)** The Hi-C read pairs were mapped to each final genome assembly using the Juicer pipeline, followed by visualization in Juicebox. Chromosomes and unanchored scaffolds were separated by grids. The Z chromosomes are the ones at the right bottom for monk parakeet and blue-fronted amazon, and for budgerigar the Z chromosome is the top left one. **b)** The dot-plots between the chicken and monk parakeet genomes and between paradise crow and monk parakeet genomes generated in D-Genies<sup>5</sup>.

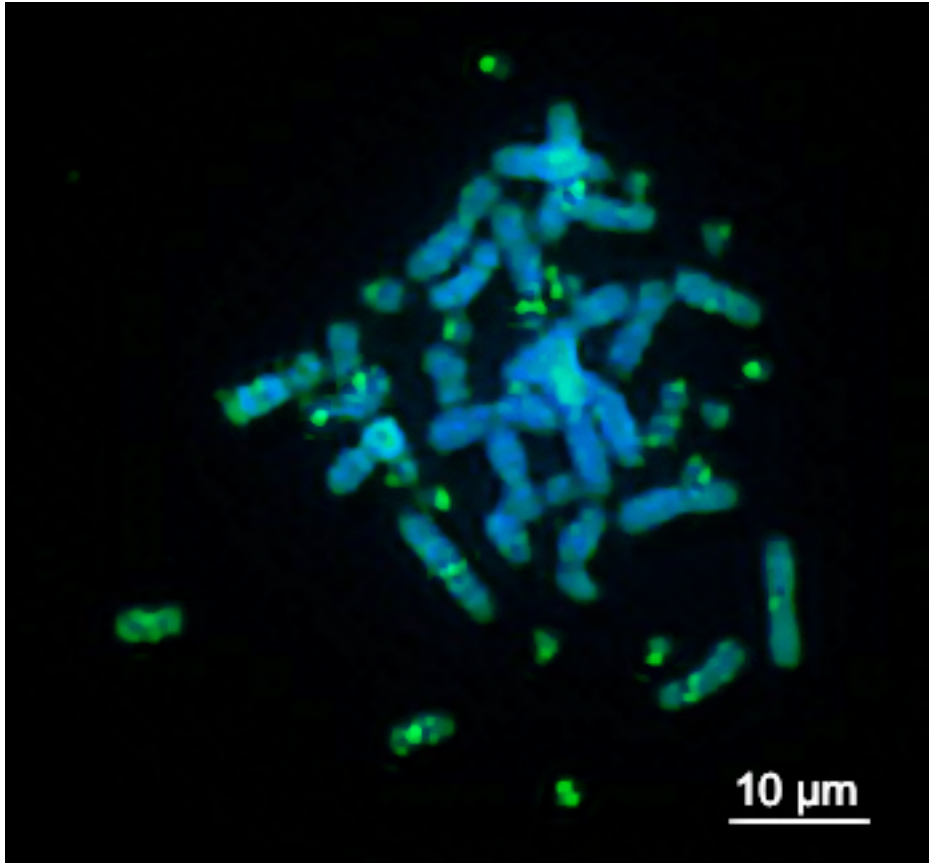

**Supplementary Fig. S3 Hybridization of the candidate centromere satellite.** The candidate centromeric satellite repeat is 191 bp long (GTGTATTCAAATGCTGTGAGAAGAGAAAAGCAAGGAGCGAGTGCAATGTAGGTGGCGCTGTTGCAAAGCTTACTGTTTGCAGAAGAGGTCCAGCAGCACCTTTCAGTCCTGGCTCTTCGTCTGTGGGAGCAGAGGTCA ATAATTCTTGCGCTACATACTCGGCTTCTGAATGG CAGGGAGCGGGCACCACAG). In many chromosomes, including the Z chromosome, the probe of the satellite sequence hybridizes in the centromeric regions. This figure shows a representative result from one experiment.

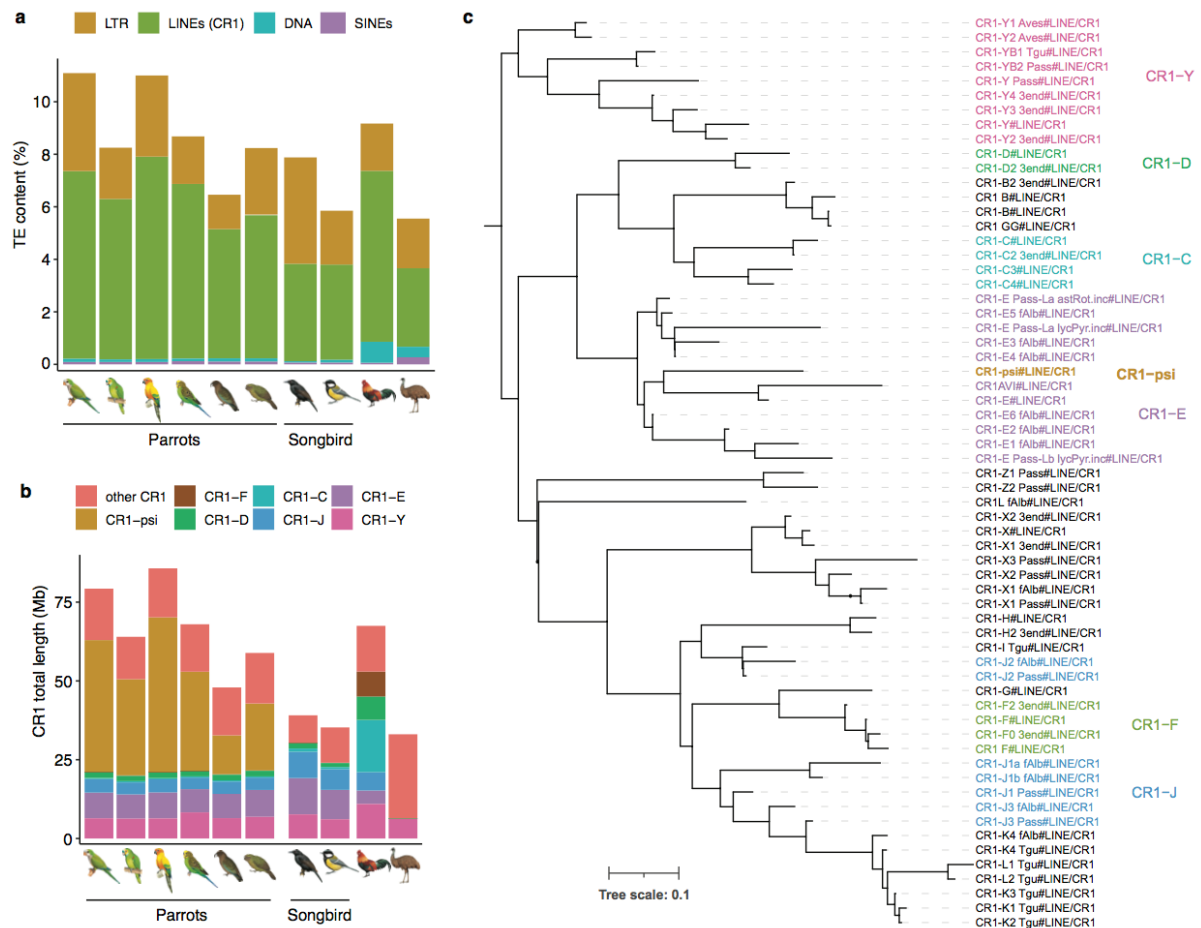

**Supplementary Fig. S4 Comparison of TE content between parrot and other bird genomes. a)** The Y axis shows the TE content (%) of the bird genomes. Satellite DNA or simple repeats were not included. Species from the left to right are monk parakeet, blue-fronted amazon, sun parakeet, budgerigar, kea, kakapo, paradise crow, great tit, chicken and emu. **b)** The cumulative length of CR1 (chicken repeat 1) elements. The parrot genomes have abundant CR1-psi elements while the chicken genome has a relatively high amount of the CR1-C elements. **c)** The maximum-likelihood phylogeny of CR1 subfamilies from Suh et al. (2017)<sup>6</sup> and Warren et al. (2010)<sup>7</sup> together with CR1-psi, which clusters with other CR1-E elements. The text colours represent the families of CR1 elements.

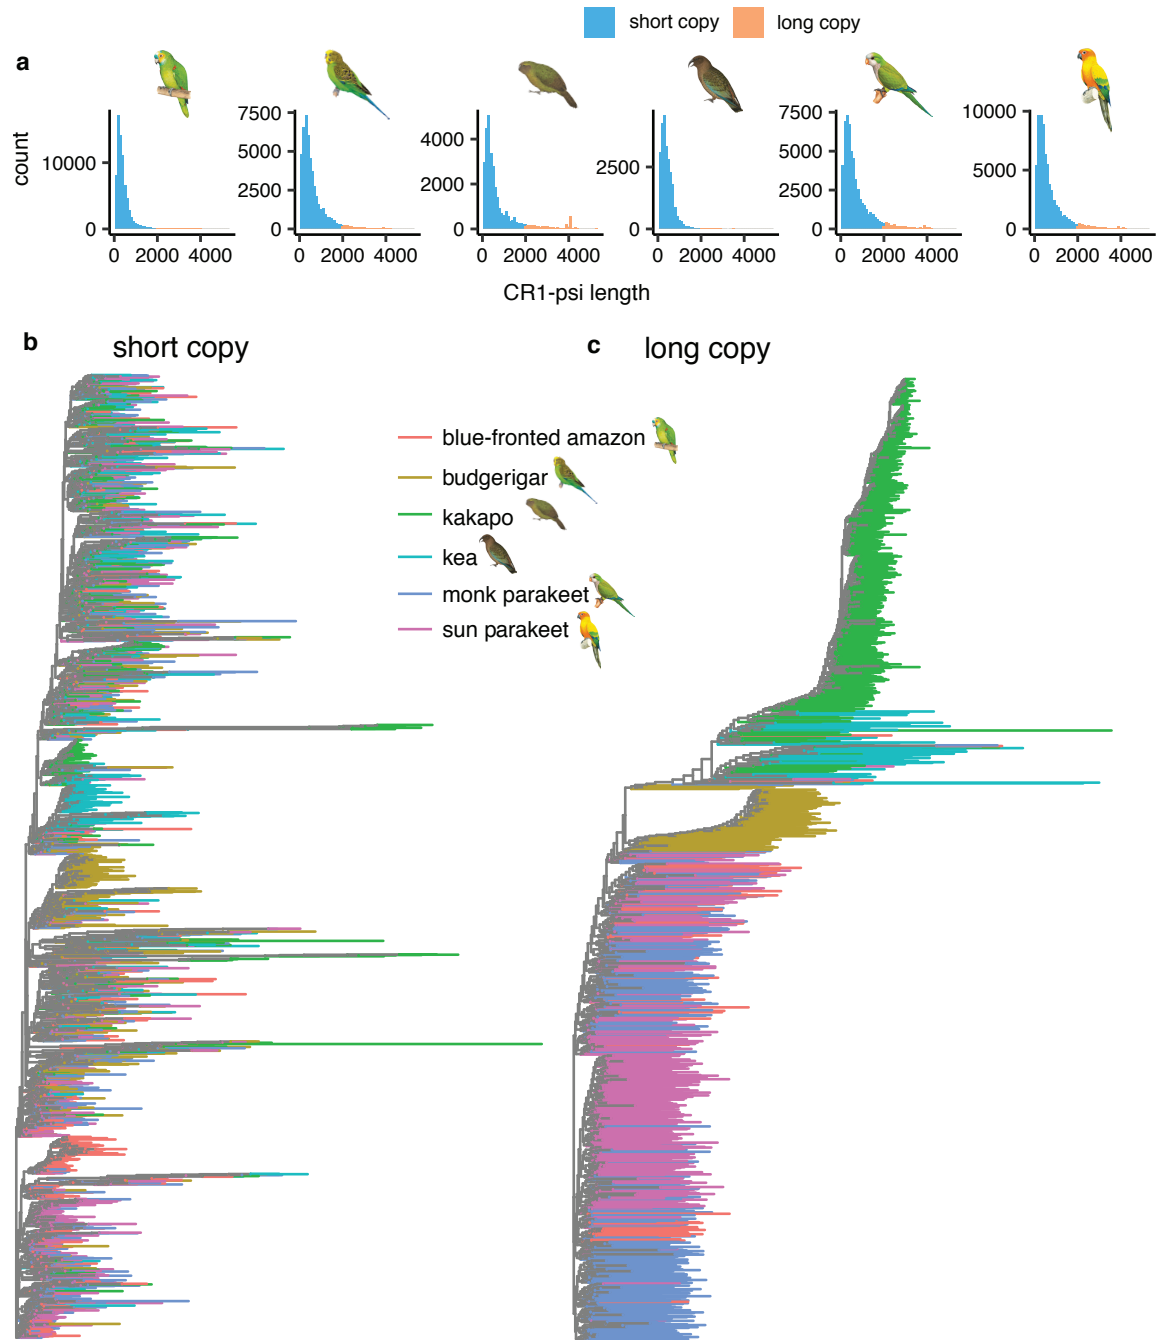

**Supplementary Fig. S5 Abundance of long CR1-psi copies in the parrot genomes. a)** The long-copy CR1-psi elements are defined as those that are at least 2,000 bp long. Most of the CR1-psi elements are much shorter due to 5' truncation. The total number ( $n$ ) of CR1-psi is labelled for each species. **b-c)** The maximum-likelihood phylogenetic analyses show that most 5'-truncated CR1-psi elements do not cluster by species while the long-copy CR1-psi elements do so.

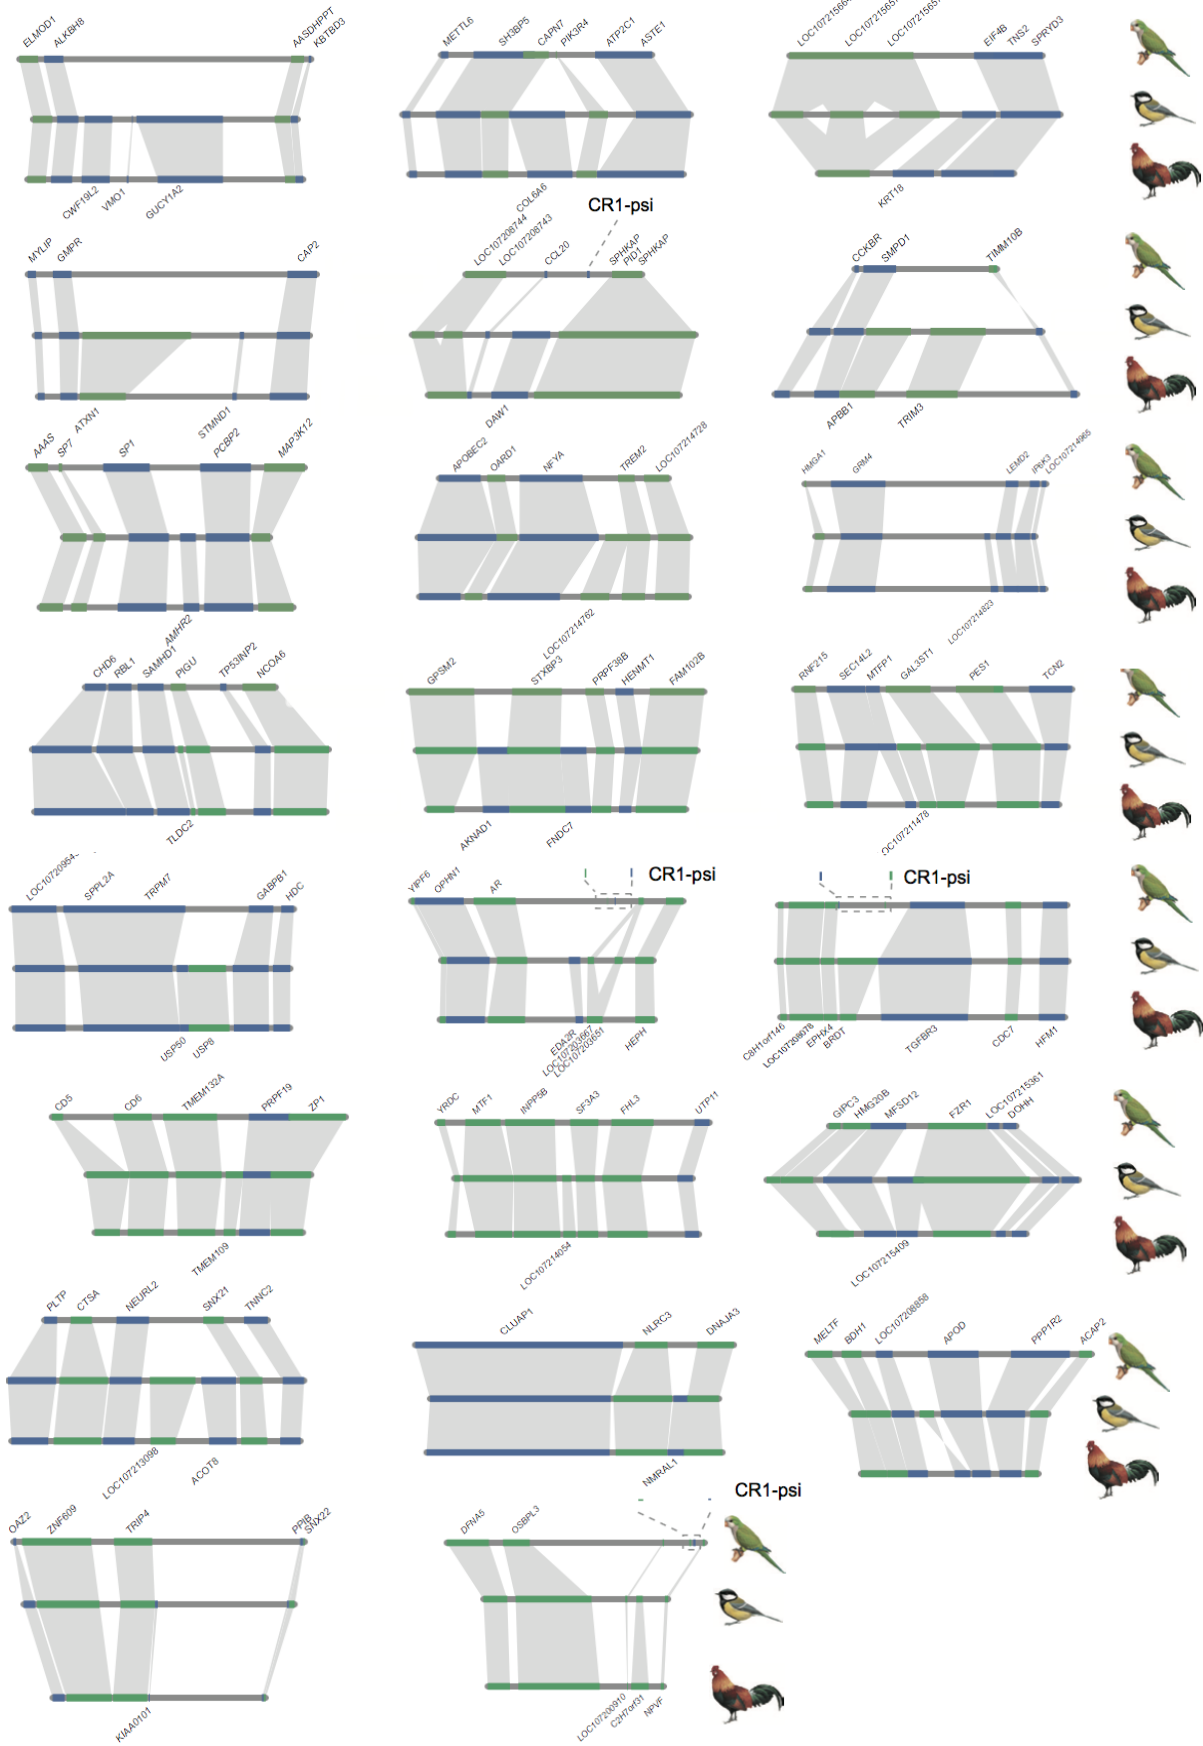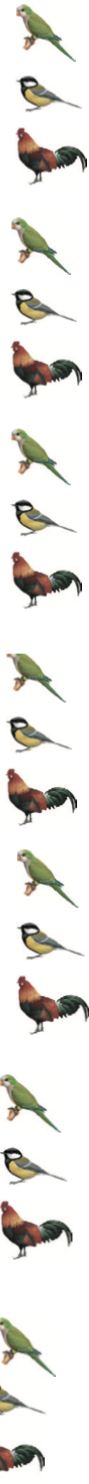

CR1-psi

CR1-psi

CR1-psi

CR1-psi

### Supplementary Fig. S 6 Conserved gene synteny at parrot gene-loss loci.

The gene names are labelled above or beneath the synteny blocks. In four cases, the presence of CR1-psi is highlighted. The case of *ALC1* is shown in the main Figure 1.

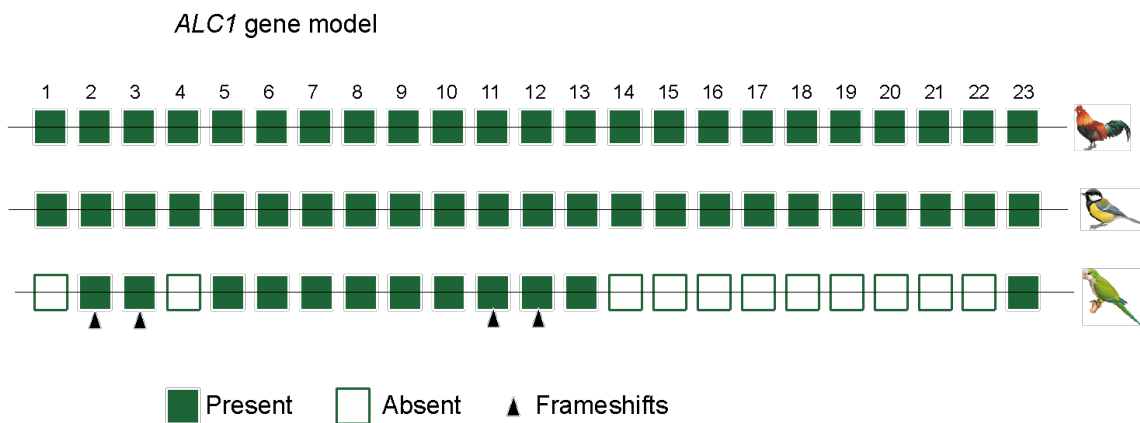

### Supplementary Fig. S7 Gene loss of *ALC1* through pseudogenization.

The 23 exons of *ALC1* are shown in chicken and great tit that were intact, and 11 of them have been deleted in monk parakeet (and other parrots including kakapo). Furthermore, frameshift mutations were detected in four of the intact exons.

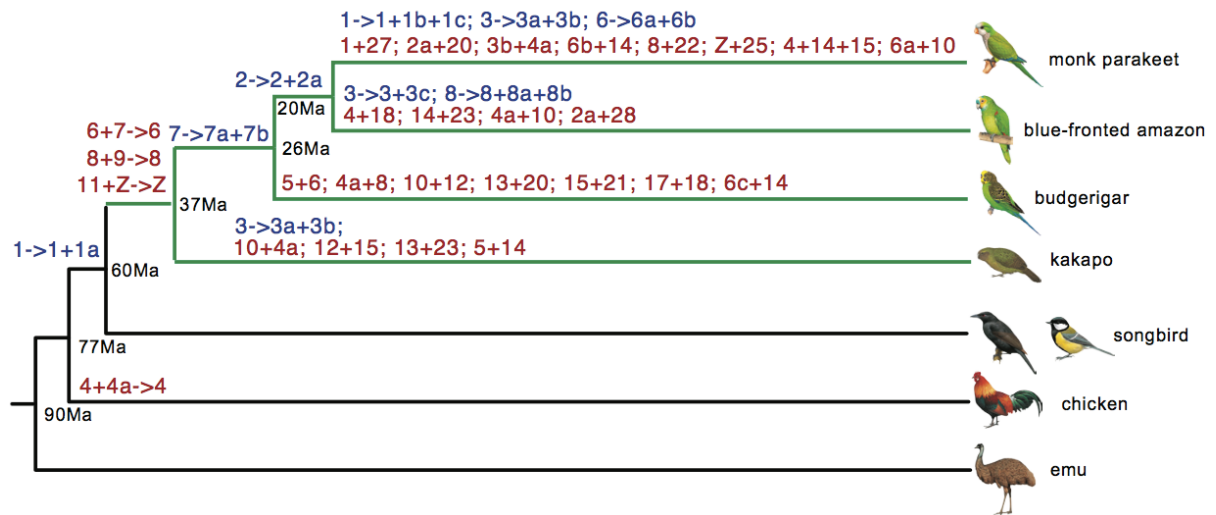

**Supplementary Fig. S8 Evolutionary history of chromosome fusions and fission.**

The fusion (red) and fission (blue) events are labelled at each branch. Songbirds and emu did not experience lineage-specific chromosome rearrangements.



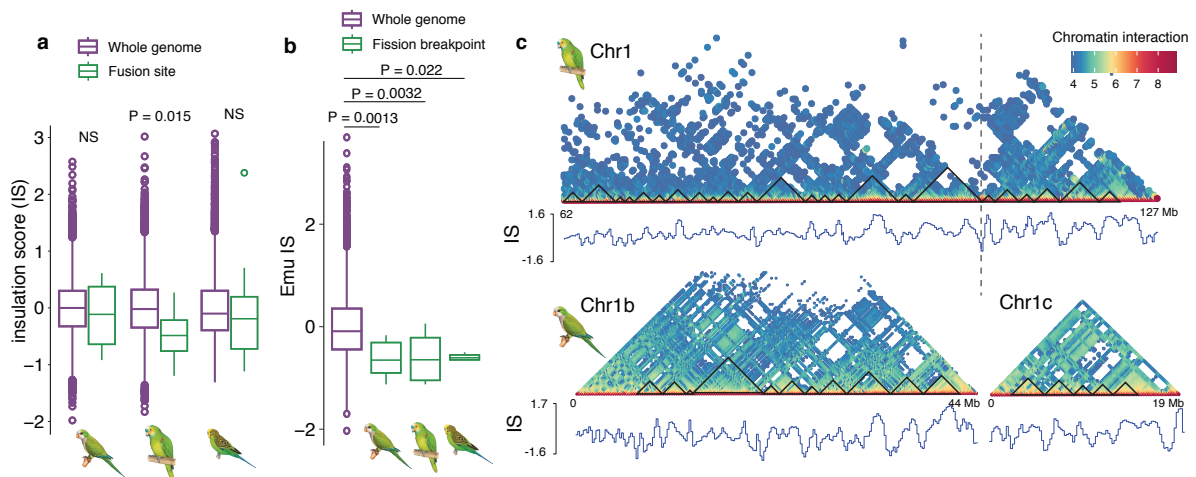

### Supplementary Fig. S9 Insulation scores at the breakpoints of chromosomal rearrangements

**a)** The EBPs of fusion tend to have lower insulation scores compared to the genomic average. The numbers of fusions that were tested for: 17 in monk parakeet, 8 in blue-fronted amazon and 12 in budgerigar. The whole-genome insulation scores (n=5,693 in monk parakeet, n=5,583 in blue-fronted amazon, n=5,322 in budgerigar) were used as a control. The boxplots show the first quartile, median and third quartile values. Two-tailed Wilcoxon test, NS = not significant. **b)** We compared the insulation scores at the evolutionary breakpoints (EBPs) of fissions between emu and parrot genomes that show significantly lower values compared to the genomic average. The numbers of fissions are 9 in blue-fronted amazon, 4 in budgerigar and 9 in monk parakeet. Emu insulation scores across the genome (n=6,050) were used as a control. Two-tailed Wilcoxon test without adjustments for multiple comparisons. **c)** one example of chromosomal fission in monk parakeet compared to blue-fronted amazon. The Hi-C matrix was generated at 100-kb resolution. The EBP indicated by a vertical dashed line has the lowest insulation score along the chromosome (only a part of chr1 is shown).

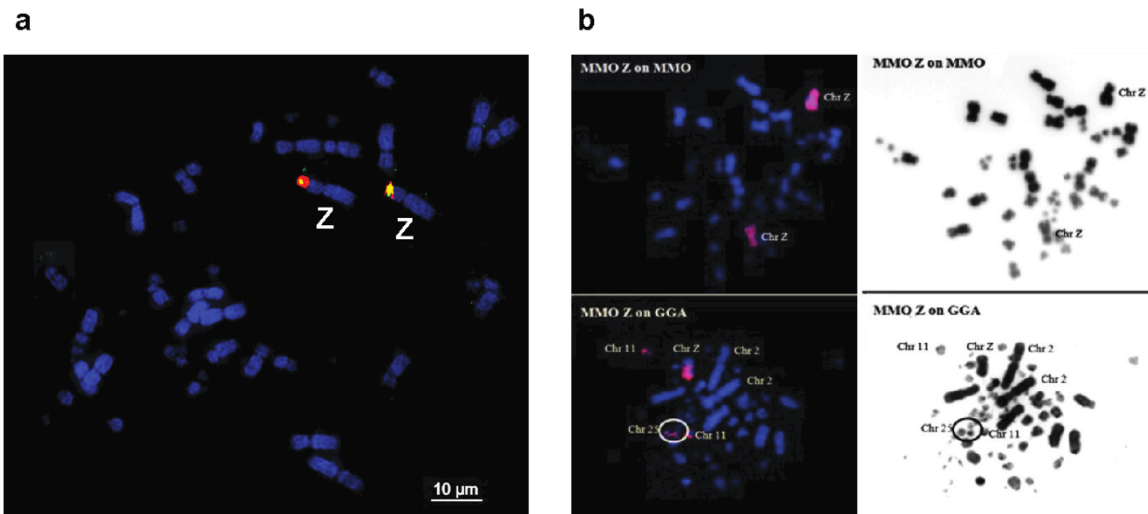

**Supplementary Fig. S10 Fusion of chr11 and chr25 into monk parakeet sex chromosome.**

**a)** FISH result (one representative experiment) for the probe of chicken chr25 hybridizing in male monk parakeet. The chr25 was added at the end of the Z chromosome. **b)** Chromosome pairing of the Z chromosome of monk parakeet in chicken. The Z chromosome probe from monk parakeet (MMO), isolated by flow sorting, hybridizes on one pair of chromosomes in MMO, however in chicken (GGA) this probe hybridizes on GGAZ, GGA11 and GGA25.

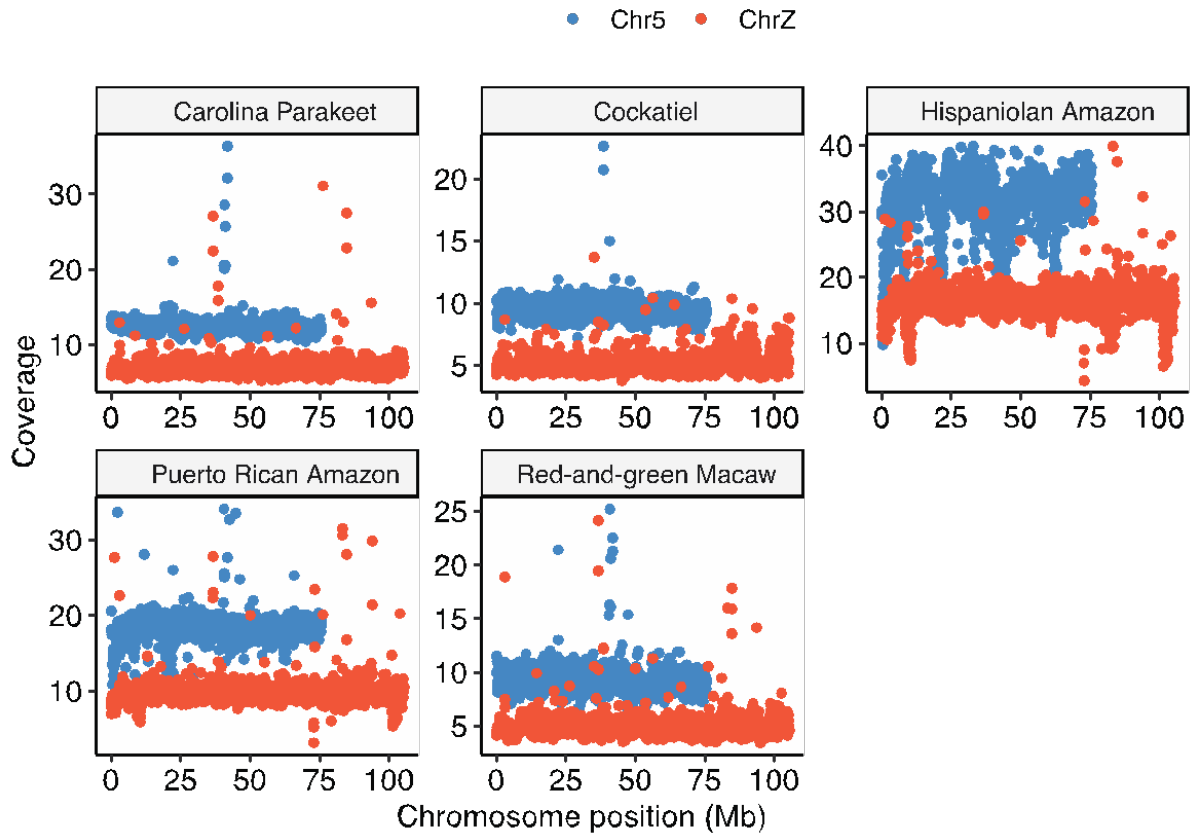

**Supplementary Fig. S11 Reduced sequencing coverage of the Z chromosome.** We generated re-sequencing data of additional two parrot species (red-and-green macaw and cockatiel). Together with published resequencing data of three parrots, we show that in females the Z chromosomes of parrots all have half-coverage relative to the autosomes (here using chr5 as an example). The entire Z chromosome is more than 100 Mb long, including the Z chromosome shared by all birds (~80 Mb) and newly added sequence from chr11 (~25 Mb). Sequencing coverage was calculated per 50-kb window (dot).

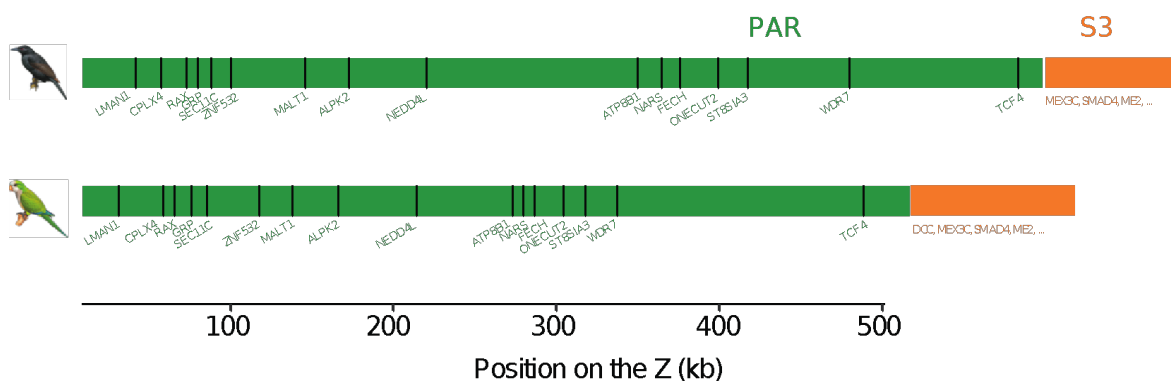

**Supplementary Fig. S12 The pseudoautosomal region (PAR) boundaries align between songbirds and parrots.** The PARs have similar sizes in songbird (represented by paradise crow, upper panel, ~610 kb) and parrot (represented by monk parakeet, lower panel, ~520 kb). Only a part of S3 is shown. According to gene synteny, the boundaries of PARs have a similar genomic location. The gene *DCC* has been lost in the songbird lineage.

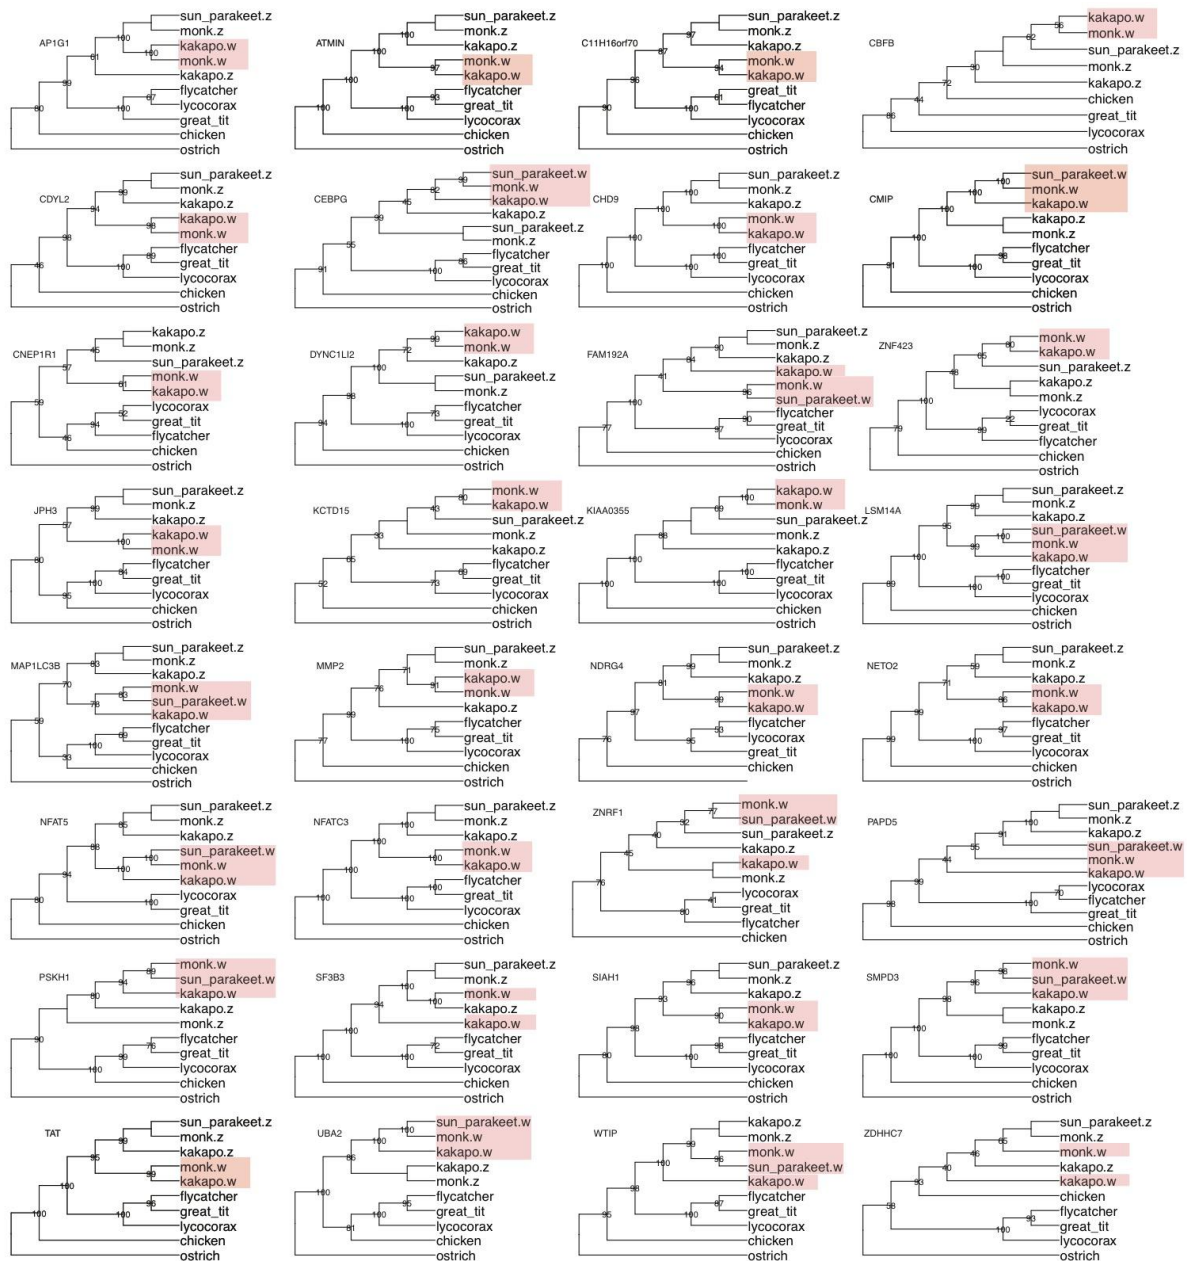

**Supplementary Figure S13 The phylogeny of gametologs on the chr11-derived neo-sex chromosome (S4).**

We show the phylogeny of gametologs that are present on the W chromosome of at least two parrots. The phylogeny was reconstructed using the maximum likelihood method. The numbers at the nodes stand for % bootstrap support. The W-linked gametologs are highlighted in red, ending with the postfix ".w". The Z-linked genes end with the postfix ".z". The gametologs tend to cluster by sex chromosome instead of species.

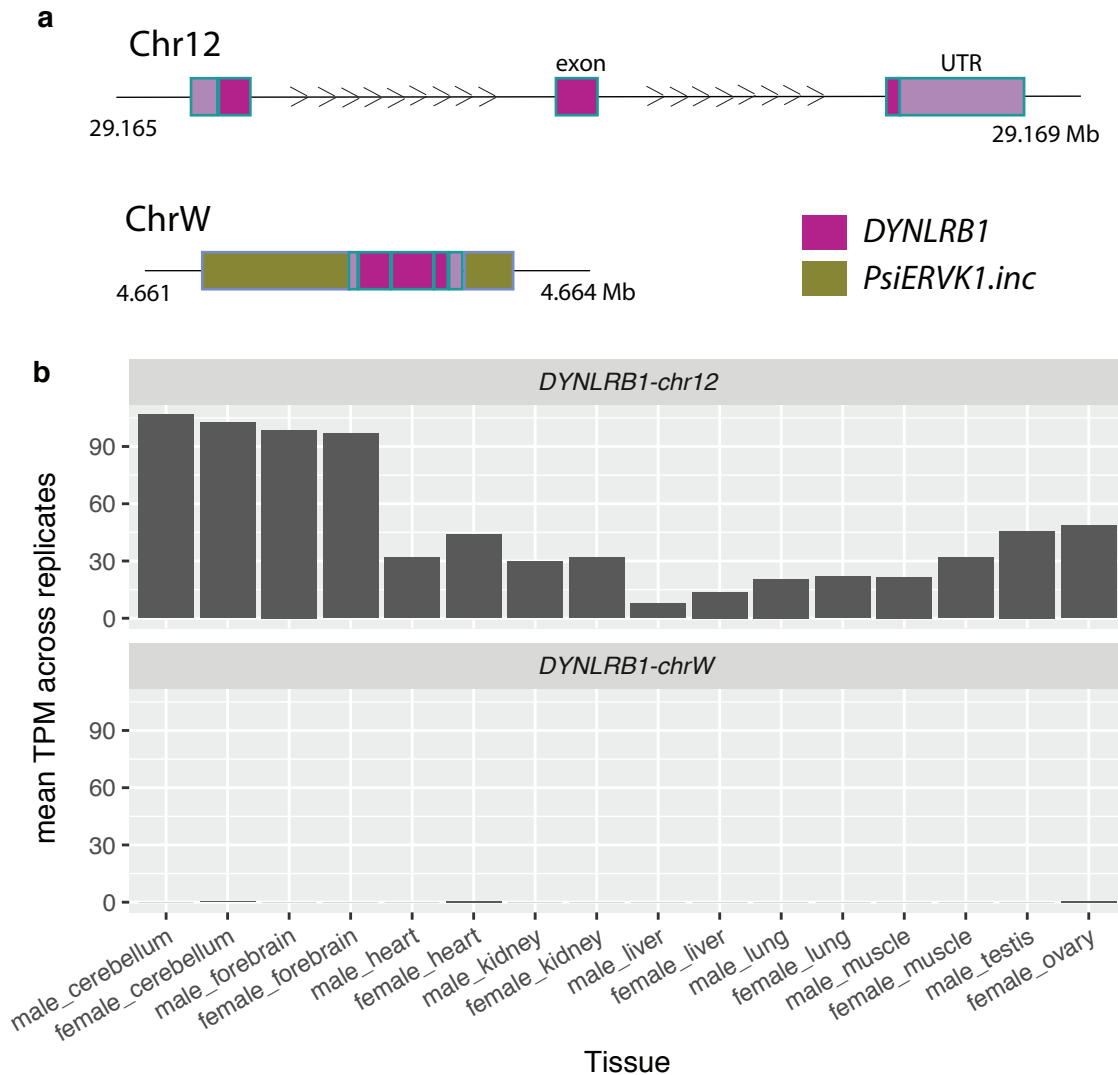

**Supplementary Fig. S14 The expression of the retrogene *DYNLRB1* across tissues.**

**a)** *DYNLRB1* has two introns on Chr12 but none on chrW. The intronless copy on the chrW including partial UTR sequences is embedded within the internal region of an ERVK (a retrovirus-like LTR family) element, consistent with the prediction of the model of LTR-mediated retroposition<sup>8</sup>. **b)** The retrogene on the W chromosome has little expression while its parental gene on chromosome 12 is broadly expressed across tissues.

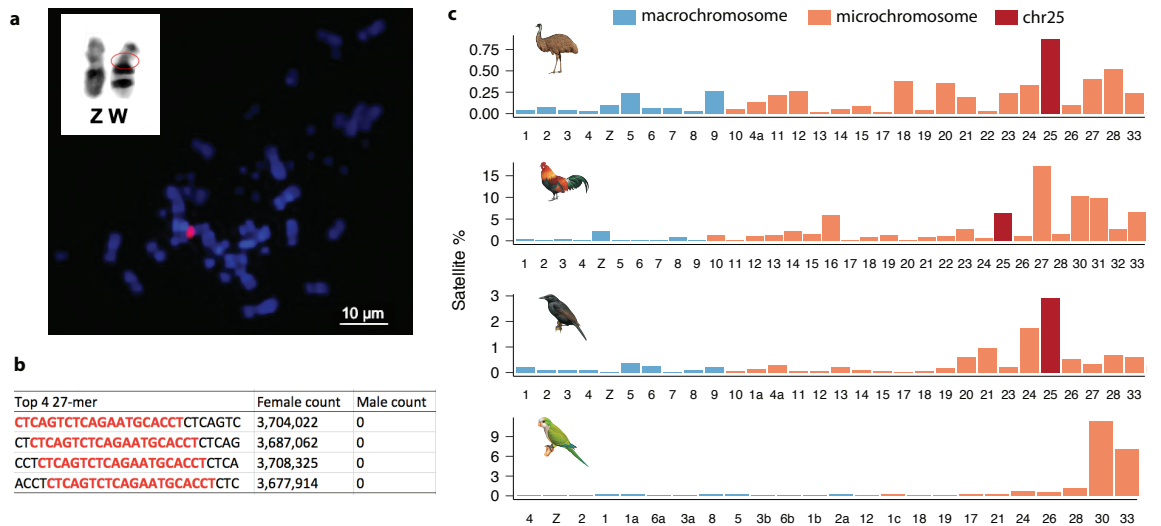

### Supplementary Fig. S15 Expansion of satellite DNA contributes to W chromosome enlargement

**a)** G-banding (one representative experiment) of the ZW sex chromosome and the image of the FISH experiment with the probe of SatW20 (red) for a female cell of monk parakeet. **b)** The top four most abundant k-mers (k-mer size 27) in females are absent in male sequencing data. **c)** The proportion of satellite DNA sequences in the chromosomes of four bird genomes assembled with long reads. The chromosome 25 that is fused to the sex chromosomes of monk parakeet is highlighted in dark red.

**Table S1. The list of genes lost in parrots**

| Orthologous group | Gene name  | Chicken ID     | Great tit ID   | Location                  |
|-------------------|------------|----------------|----------------|---------------------------|
| OG0013596         | ALC1       | XP_416560.4    | XP_015485900.1 | Within synteny block      |
| OG0013797         | CD200L     | XP_025005111.1 | XP_015500432.1 |                           |
| OG0013338         | NEK3       | XP_015131494.1 | XP_015491446.1 | Within synteny block      |
| OG0002454         | VMO1       | NP_001161233.1 | XP_015496615.1 | Within synteny block      |
| OG0013782         | IL18BP     | XP_015136386.2 | XP_015481799.1 |                           |
| OG0013223         | LAMTOR1    | XP_015136391.1 | XP_015488455.1 |                           |
| OG0013228         | APBB1      | XP_015136418.2 | XP_015470594.1 | Within synteny block      |
| OG0013335         | C2H7orf31  | XP_025003204.1 | XP_015507405.1 | Within synteny block      |
| OG0011743         | COL6A6     | XP_025003257.1 | XP_018861406.1 | Within synteny block      |
| OG0012938         | STMND1     | XP_004939700.1 | XP_015507674.1 | Within synteny block      |
| OG0013323         | EDA2R      | NP_001076829.1 | XP_015482328.1 | Within synteny block      |
| OG0013285         | CXorf65    | XP_004940695.1 | XP_015499759.1 |                           |
| OG0013311         | AKAP14     | XP_015134118.1 | XP_015482336.1 |                           |
| OG0014078         | LOC1070562 | XP_015156821.2 | XP_015471677.1 |                           |
| OG0001672         | ALOX15B    | XP_025006790.1 | XP_015471741.1 |                           |
| OG0013502         | PTPRCAPL   | XP_015156944.2 | XP_015487718.1 |                           |
| OG0013337         | TMEM109    | XP_015141615.1 | XP_018862622.1 | Within synteny block      |
| OG0013267         | FNDC7      | XP_004943153.1 | XP_015491325.1 | Within synteny block      |
| OG0013332         | BRDT       | XP_015146127.1 | XP_015491066.1 | Within synteny block      |
| OG0013970         | LOC424727  | XP_015146563.1 | XP_015472246.1 |                           |
| OG0013310         | CCDC61     | XP_015132430.1 | XP_015500779.1 |                           |
| OG0013193         | DAW1       | XP_422608.5    | XP_015492494.1 | Within synteny block      |
| OG0013802         | BDH1B      | XP_422703.2    | XP_015493312.1 |                           |
| OG0013343         | KIAA0101   | XP_004943765.1 | XP_015494687.1 | Within synteny block      |
| OG0013307         | USP50      | XP_004943871.1 | XP_015494121.1 | Within synteny block      |
| OG0014207         | LOC426456  | XP_003641932.1 | XP_015495176.1 | Within synteny block      |
| OG0013517         | PARP3      | XP_015148336.1 | XP_015496859.1 | boundary of synteny block |
| OG0013518         | EIF4E3     | XP_003642075.1 | XP_015496087.1 | Within synteny block      |
| OG0013512         | CDK20      | XP_025010742.1 | XP_015471635.1 |                           |
| OG0013767         | NMRAL1     | NP_001025816.1 | XP_015498765.1 | Within synteny block      |
| OG0014239         | LOC1125335 | XP_025011377.1 | XP_015471906.1 |                           |
| OG0013772         | LOC1017508 | XP_004934491.1 | XP_015498945.1 |                           |
| OG0013288         | LOC1017514 | XP_025011443.1 | XP_015498980.1 | Within synteny block      |
| OG0013768         | BLEC2      | NP_001038147.1 | XP_018860886.1 |                           |
| OG0013548         | PRF1       | XP_015135083.1 | XP_015472306.1 |                           |
| OG0013255         | TLDC2      | XP_024998153.1 | XP_015502794.1 | Within synteny block      |
| OG0014975         | ZSWIM1     | XP_004947258.1 | XP_015502618.2 | Within synteny block      |
| OG0013884         | LOC1070504 | XP_024998624.1 | XP_015471841.1 |                           |
| OG0013971         | LOC1070504 | XP_024998670.1 | XP_015472139.1 |                           |
| OG0013449         | GNLY       | NP_001038145.1 | XP_015504261.1 |                           |
| OG0014218         | ATPIF1     | XP_015153068.1 | XP_015504550.1 | boundary of synteny block |
| OG0013342         | LOC1070550 | XP_024998921.1 | XP_015504548.1 | Within synteny block      |
| OG0013220         | TMEM234    | XP_417801.1    | XP_015504539.1 | boundary of synteny block |

|           |             |                |                |                           |
|-----------|-------------|----------------|----------------|---------------------------|
| OG0013217 | CNR2        | XP_024998919.1 | XP_018864427.1 | boundary of synteny block |
| OG0013279 | FAM118B     | XP_015153460.1 | XP_015505422.1 | boundary of synteny block |
| OG0013640 | ECM1        | XP_015154147.2 | XP_015505723.1 |                           |
| OG0013610 | PSRC1       | XP_015154266.2 | XP_015506228.1 |                           |
| OG0013254 | MLN         | NP_001292058.1 | XP_015506022.1 | Within synteny block      |
| OG0013253 | TREM-B1     | XP_015154442.1 | XP_015505901.1 | Within synteny block      |
| OG0013504 | LOC1125303  | XP_024999703.1 | XP_015471612.1 |                           |
| OG0013776 | LOC1017482  | XP_004948755.1 | XP_015507032.1 | Within synteny block      |
| OG0013314 | GLTSCR2     | XP_015129286.1 | XP_015472425.1 |                           |
| OG0013540 | B9D2        | XP_025000288.1 | XP_015471766.1 |                           |
| OG0013875 | TGFB1       | NP_001305385.1 | XP_015471764.1 |                           |
| OG0013295 | LOC1070513  | XP_025000292.1 | XP_015472362.1 |                           |
| OG0013580 | LOC1070496  | XP_015128804.2 | XP_015472265.1 |                           |
| OG0012833 | KRT18       | XP_025001434.1 | XP_015507511.1 | Within synteny block      |
| OG0014015 | FRMD8       | XP_025001388.1 | XP_015471936.2 |                           |
| OG0014006 | SCYL1       | XP_015129129.2 | XP_015471934.1 |                           |
| OG0013897 | STIP1       | XP_025001433.1 | XP_015472133.1 |                           |
| OG0013609 | BANF1       | XP_015129736.1 | XP_015472069.1 |                           |
| OG0013506 | MFSD5       | XP_025001264.1 | XP_015507559.1 | boundary of synteny block |
| OG0013237 | LOC1070514  | XP_025001328.1 | XP_015471385.1 | Within synteny block      |
| OG0014226 | LOC1070510  | XP_025001602.1 | XP_015471744.1 |                           |
| OG0013662 | LOC1070507  | XP_025001590.1 | XP_015471747.1 |                           |
| OG0014212 | LOC1070500  | XP_015129308.1 | XP_015472460.1 |                           |
| OG0013465 | HOOK2       | XP_025001538.1 | XP_015472289.1 |                           |
| OG0015008 | C30H19orf53 | XP_025001609.1 | XP_015472054.1 |                           |
| OG0013325 | LOC1125309  | XP_025001586.1 | XP_015472291.1 |                           |
| OG0011508 | DHDH        | XP_015128553.1 | XP_015471845.1 |                           |
| OG0013557 | LOC1070503  | XP_025002029.1 | XP_015471843.1 |                           |
| OG0013658 | SLC25A11    | XP_025002025.1 | XP_015471754.1 |                           |
| OG0013233 | LOC1070497  | XP_025002026.1 | XP_015471755.1 |                           |
| OG0014080 | LOC1070504  | XP_025002031.1 | XP_015472232.1 |                           |

---



**Table S2 Z-W gene pair**

| <b>Gene</b>        | <b>ChrZ start</b> | <b>ChrZ end</b> | <b>Stratum</b> | <b>ChrW start</b> | <b>ChrW end</b> |
|--------------------|-------------------|-----------------|----------------|-------------------|-----------------|
| <i>SMAD4</i>       | 1014954           | 1033974         | S3             | 9764499           | 9825054         |
| <i>SMAD2</i>       | 2248169           | 2290340         | S3             | 3902685           | 4011762         |
| <i>C18orf25</i>    | 3020726           | 3048014         | S3             | 9861411           | 9922405         |
| <i>SETBP1</i>      | 3738793           | 4015322         | S3             | 2996900           | 3000412         |
| <i>UBE2R2</i>      | 8632994           | 8681984         | S2             | 5288563           | 5309912         |
| <i>UBAP2</i>       | 8688628           | 8807632         | S2             | 5315870           | 5418537         |
| <i>VCP</i>         | 9892567           | 9916811         | S2             | 6430323           | 6456834         |
| <i>ZFR</i>         | 11278571          | 11331980        | S2             | 7881390           | 7954421         |
| <i>SUB1</i>        | 11343722          | 11353354        | S2             | 7684833           | 7710247         |
| <i>ZNF131</i>      | 15289384          | 15327631        | S2             | 13687094          | 13739858        |
| <i>MIER3</i>       | 19220556          | 19238174        | S2             | 7748482           | 7773874         |
| <i>ZSWIM6</i>      | 20930711          | 20931418        | S2             | 12086763          | 12087890        |
| <i>SREK1</i>       | 22829613          | 22860731        | S2             | 5661075           | 5680607         |
| <i>COL4A3BP</i>    | 26013407          | 26094842        | S2             | 6025267           | 6104853         |
| <i>TNPO1</i>       | 27198906          | 27259179        | S2             | 9264907           | 9338253         |
| <i>MAP1B</i>       | 27491276          | 27557806        | S2             | 9141498           | 9141995         |
| <i>RFX3</i>        | 28878969          | 28941350        | S0             | 8302647           | 8385027         |
| <i>GNAQ</i>        | 40048630          | 40256533        | S1             | 5842516           | 5971002         |
| <i>HNRNPK</i>      | 42514038          | 42534950        | S1             | 5503778           | 5536717         |
| <i>SPIN1</i>       | 46815323          | 46819778        | S1             | 2698680           | 2702139         |
| <i>KCMF1</i>       | 52787575          | 52811407        | S0             | 5749747           | 5772504         |
| <i>PCGF3</i>       | 53961679          | 53972536        | S0             | 3399119           | 3448958         |
| <i>CHD1</i>        | 81457059          | 81512125        | S1             | 3106976           | 3154632         |
| <i>RSPRY1</i>      | 81767852          | 81790028        | S4             | 2191101           | 2249337         |
| <i>FAM192A</i>     | 81807976          | 81823112        | S4             | 2165528           | 2180703         |
| <i>CIAPIN1</i>     | 82027802          | 82032772        | S4             | 6374716           | 6379188         |
| <i>COQ9</i>        | 82037102          | 82043004        | S4             | 6395284           | 6396980         |
| <i>CNOT1</i>       | 82248586          | 82315790        | S4             | 11741820          | 11816877        |
| <i>CTCF</i>        | 82683613          | 82719296        | S4             | 6982635           | 7021348         |
| <i>FAM65A</i>      | 82727078          | 82750562        | S4             | 6961793           | 6962423         |
| <i>PSKH1</i>       | 82858080          | 82889307        | S4             | 1989022           | 2007681         |
| <i>NUTF2</i>       | 82950732          | 82977066        | S4             | 2103472           | 2133027         |
| <i>THAP11</i>      | 82984649          | 82985377        | S4             | 2075748           | 2076461         |
| <i>NDRG4</i>       | 83013504          | 83030253        | S4             | 12508806          | 12515128        |
| <i>CSNK2A2</i>     | 83089912          | 83116144        | S4             | 3270482           | 3271216         |
| <i>IL34</i>        | 83385060          | 83390012        | S4             | 11707180          | 11709581        |
| <i>SF3B3</i>       | 83393595          | 83424357        | S4             | 11676380          | 11702751        |
| <i>ST3GAL2</i>     | 83457163          | 83459325        | S4             | 11607163          | 11609363        |
| <i>ZNRF1</i>       | 83694921          | 83712425        | S4             | 8020633           | 8021496         |
| <i>BCAR1</i>       | 83720059          | 83726762        | S4             | 8013361           | 8013922         |
| <i>CBFB</i>        | 84264053          | 84304300        | S4             | 9957610           | 9987997         |
| <i>C11H16orf70</i> | 84317296          | 84350416        | S4             | 10883733          | 10932799        |
| <i>SMPD3</i>       | 84833469          | 84865665        | S4             | 10527013          | 10595439        |

|                  |           |           |    |          |          |
|------------------|-----------|-----------|----|----------|----------|
| <i>NFATC3</i>    | 85165297  | 85241674  | S4 | 10779992 | 10833898 |
| <i>MMP2</i>      | 85651577  | 85689521  | S4 | 1668971  | 1715626  |
| <i>CHD9</i>      | 87213937  | 87312277  | S4 | 6636412  | 6721281  |
| <i>PAPD5</i>     | 89148381  | 89195929  | S4 | 4114117  | 4163619  |
| <i>CNEP1R1</i>   | 89226071  | 89231929  | S4 | 4219439  | 4220320  |
| <i>ZNF423</i>    | 89437646  | 89447999  | S4 | 4348058  | 4530127  |
| <i>SIAH1</i>     | 90121002  | 90125141  | S4 | 11340276 | 11372496 |
| <i>URI1</i>      | 90346054  | 90390470  | S4 | 11032518 | 11093288 |
| <i>CEBPG</i>     | 92448998  | 92449450  | S4 | 13589877 | 13590329 |
| <i>KCTD15</i>    | 92882932  | 92918195  | S4 | 13409070 | 13459263 |
| <i>LOC415780</i> | 92919158  | 93068345  | S4 | 13237964 | 13333064 |
| <i>LSM14A</i>    | 93079720  | 93098980  | S4 | 13199854 | 13239180 |
| <i>SS18L2</i>    | 93102110  | 93103292  | S4 | 13198057 | 13199296 |
| <i>KIAA0355</i>  | 93106360  | 93137143  | S4 | 13146497 | 13194587 |
| <i>WTIP</i>      | 93268742  | 93348730  | S4 | 12925293 | 12958215 |
| <i>UBA2</i>      | 93356202  | 93376134  | S4 | 12744569 | 12822459 |
| <i>DYNC1LI2</i>  | 93601475  | 93627958  | S4 | 12643358 | 12679995 |
| <i>CDYL2</i>     | 98578716  | 98603937  | S4 | 4665702  | 4711143  |
| <i>ATMIN</i>     | 98689278  | 98700079  | S4 | 4826931  | 4836251  |
| <i>CMIP</i>      | 98878709  | 99021093  | S4 | 5064109  | 5132070  |
| <i>USP10</i>     | 100508557 | 100561031 | S4 | 2502984  | 2571990  |
| <i>ZDHHC7</i>    | 100707151 | 100719114 | S4 | 2367955  | 2395668  |
| <i>MAP1LC3B</i>  | 101636027 | 101641156 | S4 | 8683071  | 8692999  |
| <i>ZCCHC14</i>   | 101643464 | 101698403 | S4 | 8694809  | 8761948  |
| <i>JPH3</i>      | 101723364 | 101788364 | S4 | 8810299  | 8865503  |
| <i>BANP</i>      | 101935432 | 102003661 | S4 | 7542675  | 7630317  |
| <i>ZC3H18</i>    | 102375772 | 102428101 | S4 | 885732   | 937418   |
| <i>PIEZO1</i>    | 102453351 | 102481515 | S4 | 944608   | 944865   |
| <i>RPL13</i>     | 102887910 | 102892815 | S4 | 1046448  | 1050069  |
| <i>VPS9D1</i>    | 102924648 | 102929632 | S4 | 319848   | 320585   |
| <i>TUBB3</i>     | 103014710 | 103017626 | S4 | 257349   | 259930   |
| <i>NFAT5</i>     | 103157142 | 103221948 | S4 | 659930   | 774019   |
| <i>PSMD7</i>     | 103278359 | 103284525 | S4 | 536958   | 543588   |
| <i>ZNF821</i>    | 104107803 | 104122003 | S4 | 1338050  | 1341830  |
| <i>ATXN1L</i>    | 104120437 | 104130648 | S4 | 1348548  | 1350611  |
| <i>AP1G1</i>     | 104134836 | 104186500 | S4 | 1377961  | 1451135  |
| <i>TAT</i>       | 104238808 | 104247346 | S4 | 1476423  | 1476815  |
| <i>GABARAPL2</i> | 104308642 | 104310951 | S4 | 12276520 | 12280539 |
| <i>GPT2</i>      | 105028512 | 105054407 | S4 | 7179713  | 7196657  |
| <i>DNAJA2</i>    | 105074085 | 105084739 | S4 | 7453238  | 7464446  |
| <i>NETO2</i>     | 105131919 | 105163739 | S4 | 6179038  | 6197564  |

---

**Table S3 male-to-female gene expression ratio**

| tissue       | old sex chromosome |      | neo-sex chromoosme |      |
|--------------|--------------------|------|--------------------|------|
|              | mean               | SD   | mean               | SD   |
| cerebellum   | 1.89               | 0.50 | 1.82               | 0.52 |
| forebrain    | 1.87               | 0.46 | 1.78               | 0.45 |
| heart        | 1.66               | 0.55 | 1.62               | 0.51 |
| kidney       | 1.73               | 0.45 | 1.68               | 0.45 |
| liver        | 2.08               | 0.79 | 2.01               | 0.78 |
| lung         | 1.80               | 0.42 | 1.82               | 0.44 |
| muscle       | 1.70               | 0.66 | 1.80               | 0.83 |
| ovary/testis | 2.02               | 1.78 | 2.11               | 2.16 |

**Table S4 Genome assemblies used in this study**

| <b>Species</b>                  | <b>Common name</b>  | <b>Assembly</b>                                                                                                                                                             | <b>Reference</b> |
|---------------------------------|---------------------|-----------------------------------------------------------------------------------------------------------------------------------------------------------------------------|------------------|
| <i>Gallus gallus</i>            | Chicken             | GCA_000002315.6<br>( <a href="https://www.ncbi.nlm.nih.gov/assembly/GCF_000002315.6">https://www.ncbi.nlm.nih.gov/assembly/GCF_000002315.6</a> )                            | 9                |
| <i>Parus major</i>              | Great tit           | GCF_001522545.2<br>( <a href="https://www.ncbi.nlm.nih.gov/assembly/GCF_001522545.2">https://www.ncbi.nlm.nih.gov/assembly/GCF_001522545.2</a> )                            | 10               |
| <i>Dromaius novaehollandiae</i> | Emu                 | GCA_016128335.1<br>( <a href="https://www.ncbi.nlm.nih.gov/assembly/GCA_016128335.1">https://www.ncbi.nlm.nih.gov/assembly/GCA_016128335.1</a> )                            | 11               |
| <i>Lycocorax pyrrhopterus</i>   | Paradise crow       | GCA_014706295.1<br>( <a href="https://www.ncbi.nlm.nih.gov/assembly/GCA_014706295.1">https://www.ncbi.nlm.nih.gov/assembly/GCA_014706295.1</a> )                            | 12               |
| <i>Amazona aestiva</i>          | blue-fronted amazon | GCA_001420675.1<br>( <a href="https://www.ncbi.nlm.nih.gov/assembly/GCA_001420675.1">https://www.ncbi.nlm.nih.gov/assembly/GCA_001420675.1</a> ) (scaffolded in this study) | 1                |
| <i>Melopsittacus undulatus</i>  | budgerigar          | GCA_000238935.1<br>( <a href="https://www.ncbi.nlm.nih.gov/assembly/GCA_000238935.1">https://www.ncbi.nlm.nih.gov/assembly/GCA_000238935.1</a> )                            | 2                |
| <i>Strigops habroptilus</i>     | kakapo              | GCA_004027225.2<br>( <a href="https://www.ncbi.nlm.nih.gov/assembly/GCA_004027225.2">https://www.ncbi.nlm.nih.gov/assembly/GCA_004027225.2</a> )                            | 4                |
| <i>Aratinga solstitialis</i>    | sun parakeet        | GCA_902168055.1<br>( <a href="https://www.ncbi.nlm.nih.gov/assembly/GCA_902168055.1">https://www.ncbi.nlm.nih.gov/assembly/GCA_902168055.1</a> )                            | 13               |
| <i>Myiopsitta monachus</i>      | monk parakeet       |                                                                                                                                                                             | This study       |
| <i>Nestor notabilis</i>         | kea                 | GCA_000696875.1<br>( <a href="https://www.ncbi.nlm.nih.gov/assembly/GCA_000696875.1">https://www.ncbi.nlm.nih.gov/assembly/GCA_000696875.1</a> )                            | 14               |

**Table S5 The consensus sequence of CR1-psi**

TCTGGGAGCTCTGCTCTGGCTGCCCGCGGTGGCCAGCGTAGGCACCCAGACAGAGCCGATGAGAGGGGAGGNTGCA  
GTGCAGGGGCTCGGGGTGCAGAGCTCGGTGCTCCCTGGTGGAGGTCTCTGCAGCAGGTGGCTGAGCTGCGGGACGCT  
GTCANTAGGCTGAAAGGTGCAGGGAAGCTGAGAGGAAGCAGCACTGCTTGTCCAGGACCAGACTGTGCAGGGGCCT  
CAAGCGTCCNCTGTNGCTCATGCAGGAAAGGAGGCCGCTAACCCAGGAAGCTGGGAAACAGTAACAGAAAAACAAC  
AAAAAAGGAGGAAGAGGACAATTAAGCAAGGGGCTTCTCCTAAATCTGTTGTCACCCAGCAACCGCTTTGCTGT  
CCTGCAGGGGGCTGATGAGGAANCACACTCCACCAGGAACAACCGGCTGATGCACTGGTAAAGAAGATCNCTACTGGT  
GCTGCCAGGAAAAAGCGGGGGCCGTAGTAGTAGGGGACTCTACTGAAAGGAACAGAGGCACCCATCTGTCCGCT  
GACCCAGGCTCAAGGGAGGTGTGTTGCCTACCAGGGGCTCGGATCAGGGATGTTGCAGAGAGGCTGCCTGCTCTAGTCG  
GTCCACTGACTATTACCACTTCTAGTGATCCATGTGGGTGCTACTGATATAGATAGCAGTAGCCCGGAGAACATAAAG  
AAGGACTACAGAGCTCTGGGAGAGGTGTTAGGGGCTCTGGAGCTCAGATTGTCTTTTCGTC AATTCTCCAGGATACAGG  
GNAGGACCTTAAGGAGGCTAGGAGGATTGGCCAGGTTAATAAATGTTAGAGGGTGGTGCATAGTCAGGGGTTTGG  
GTACCTTGAACATGGGACTCAATTAAGTAGGCCAGGTCTACTGGGGGCTGGTGGAGCTGGTCTGACAAAGAAAGGGAAG  
AGTGGNTTGGTAGGAGGCTTCCAGACTGGTCAAGGATGCTTAAACTAGATGTGTTGGGGGAGGGGGGCATCATTCC  
ATCCCAACACACCCAGTCAGTTGCCAGCACCTATAGTAAACGTTCCGGAGCAATGTAGAGATATTCCAGCCGCTCCAGCCA  
ATGAGCCGGCTTCANTTGGAGCTCGGCTCAGATGCCTCTATACAAACGCCCGTAGCATGGGGAACAAACAAGAGGAATT  
AGAGATGTGTGCACGCTACGGGGGTATGATATCATAGGCATCACAGAAACATGGTGGGATGGCTCCTATGACTGGNGT  
GTTGGAATGGAAGGTTACAGGCTCTTAGGAAAGACAGGCCCGTAGGCCGGGAGGGGGAGTTGCTATTTATGTTAGG  
GATAGGCTGGAGAGTATGGAACCTGTCTGGGGACAGGTGAGCAGTCGACAGAGAGTTTGGGGTCAAGGTTAAAGGG  
AGAACAGCGATGGGAGACATTACTGTGGGGATCTGTTACAGACCCGCTGACCAAGAGGACTCTGTGGATGAAGCGCTCT  
ATAGACAGATAGGAACAGCCTCACGCTCGCAGGCCCTTGTTCATGGGGACTTCAACCACCTGATATCTGTTGGAGG  
GACGGTACGGCCCGCACAAGCAATCCAGGAGGTTCTCGATTGTGTGGAAGACAACCTCCTTCTGCAAGTAATAGAGG  
AGCCGACAAGGAGAGGTGCCATGCTTGACCTCGTGTCAACACAGGGAAGGGCTGGTTGAAATGTGACGCTCCAGG  
GCAGCCTTGGTTGCAGCGATCATGAGATGGTCAATTGAGATCCTCAGGACAGTGAGAAGAGCGTGCAGCAAGCTCAC  
TGCCCTGGACTTCAAGAGAGCAGACTTTGGCCTCTCAGGAACCTGCTCAGTAAGGTTCCATGGGATATAGCCCTAGAGG  
GCAGGGGGGCCCAAGACTGTTGGTTGATATCAAGGATCACCTGCTGCAAGCTCAGGAGCGNTGCATCCNACTAGAAG  
GAAGTGCNCGCAGGAGGGCCAGGAGACCTCCTTGGATGGATAAGGAGCTGCTGAGGAAAATTCGAAGGAAAAAAGAGG  
CTTATAAAAGGTGGAAGCAAGGACAGGCCGCTGGGAAGAATACAGGGATGTTGTCGGGAAGCTAGGGACCAGGTTA  
GGAAAGCTAAGGCCACTTAGAATTAACCTTGGCTAGGGATGTTAAAGATAACAGGAAGGGATTCTATAGGTACGTTGC  
GAATAAAAGACAGACTAGGGACAACGTGGGCCCCCTCCGGAAGCTATCGGGGAACTGGCTACCTGGATTTGGAGAA  
GGCTGAGGTTCTAATGACTTCTTGCCTCAGTCTTACC GGCAAATGCTCTGACCACACCACCAAGTCTTGGAAAGGCAG  
ACGCAGGGACTGTGAGAATGAAGACCCTGGGCCACTGTAGGAGAGGATCTGGTTCGAGACCATCTAGGAACCTGAAC  
GTACACAAGTCCATGGGACCTGATGAAATCCATCCGCGGTCTGAAGGAGCTGGCAAATGAAGTTGCTAAGCCACTGTC  
CATCATATTTGAAAAATCATGGCAGTCAGGTGAAGTTCCCGACGACTGGAAAAAGGGAAATATAACCCCATTTTCAAGA  
AGGGGAAAATGGATGAGCCGGGGAACACTACAGACCAGTCAGTCTCACCTCTGTGCCTGGCAAATCTTGGAGCGGATCT  
CCTGGAAGGCATGCTGAGGCACATGAAAAACAACAAGGTGGTTGGTGACAGCCAGCATGGCTTCACTAAGGGGAAATCC  
TGCCTGACCAATCTGGTGGCCTTCTATGATGGGGCTACGGAACCTGATGGACAGGGGTAGAGCAGTTGATGTCATCTACCT  
GGACTTGTGCAAAGCGTTGCACACTGTCCACATGACATCCTTGTCTAAGTTGGAGAGACATCAATTTGATAGGTGGAC  
CACTCGGTGGATAAAGAAGTGGCTGGATGGCCGCACGCAAAGAGTTGTGCTCAATGGCTCAATGTCCAGCTGGAGACCA  
GTAACGAGTGGTGTCCCTCAGGGATCGGTGTTGGGACCGGTCTTGTTC AACATCTTGTCCGTGACATGGACAGTGGGAT  
TGAGTGCGCCCTCAGCAAGTTTCCGATGACACCAAGCTGTGTGGTTCGTTGATACGCTGGAGGGAAGGAATGCCATC  
CAGAGGGACCTTGACACGCTTGTGAGGTGGGCTGATGCCAACCTGATGAAGTTAACCATGCCAAGTGCAAGGTCTTACA  
CCTGGGTCCGAGCAATCCCAGGCACAGCTACAGGTTGGGCAGAGAAGAGATTAGAGCAGCCCTCGGGAGAAGGACTT  
GGGGGTGTTGGTCGATGAGAAAAATGAACATGAGCCGGCAGTGTGCGCTCGCAGCCCAGAAAGCCAACCGTATCCTGGG  
CTGCATCAAAAGGAGCGTGACCAGCAGGTCGAGGGAGGTGATCCTGCCCTCTACTCTGCTCTCGTGAGACCTCACTTGG  
AGTATTGTGTGCAAGTCTGGTGTCTCAACATAAAAAGGACATGGAAGTGTGGAACAAGTCCAGAGGAGGGCCACGAG  
GATGATCAGGGGACTGGAGCACCTCCCGTATGAAGACAGGCTGAGAAAGTTGGGGCTGTTAGCCTGGAGAAGAGAAG  
GCTGCGTGGAGACCTCATAGCAGCCTTCCAGTATCTGAAGGGGGCTATAGGGATGCTGGGGAGGGACTCTTCATNAGG  
GACTGTAGTGATAGGACAAGGGGTAACGGGTTCAAACCTTAAACAGGGGAAGTTTAGATTGGATATGAGGAAGAAATCT  
TACTGTGAGGGTGGTGAGGCACTGGAATGGGTTGCCAGGGAAGTTGTAATGCTCCATCGCTGGCGGTGTTCAAGGC  
CGGGTTGGACAGAGCCTTGGGTGGCATGGTTAGTGTGAGGTGTCCCTGCCATGGCAGGGGGGTTGGAAGTATGATGAT  
CTAAGGTCCTTCCAACCTAACTATTCTATGATTCTAT

Reference list:

1. Wirthlin, M. *et al.* Parrot Genomes and the Evolution of Heightened Longevity and Cognition. *Curr. Biol.* **28**, 4001–4008.e7 (2018).
2. Ganapathy, G. *et al.* High-coverage sequencing and annotated assemblies of the budgerigar genome. *Gigascience* **3**, 2047–217X (2014).
3. Cooke, T. F. *et al.* Genetic Mapping and Biochemical Basis of Yellow Feather Pigmentation in Budgerigars. *Cell* **171**, 427–439 (2017).
4. Rhie, A. *et al.* Towards complete and error-free genome assemblies of all vertebrate species. *Nature* **592**, 737–746 (2021).
5. Cabanettes, F. & Klopp, C. D-GENIES: Dot plot large genomes in an interactive, efficient and simple way. *PeerJ* **6**, e4958 (2018).
6. Suh, A., Smeds, L. & Ellegren, H. Abundant recent activity of retrovirus-like retrotransposons within and among flycatcher species implies a rich source of structural variation in songbird genomes. *Mol. Ecol.* **27**, 99–111 (2018).
7. Warren, W. C. *et al.* The genome of a songbird. *Nature* **464**, 757–762 (2011).
8. Tan, S. *et al.* LTR-mediated retroposition as a mechanism of RNA-based duplication in metazoans. *Genome Res.* **26**, 1663–1675 (2016).
9. Hillier, L. W. *et al.* Sequence and comparative analysis of the chicken genome provide unique perspectives on vertebrate evolution. *Nature* **432**, 695–716 (2004).
10. Laine, V. N. *et al.* Evolutionary signals of selection on cognition from the great tit genome and methylome. *Nat. Commun.* **25**, 10474 (2016).
11. Liu, J. *et al.* A new emu genome illuminates the evolution of genome configuration and nuclear architecture of avian chromosomes. *Genome Res.* **31**, 497–511 (2021).
12. Peona, V. *et al.* Identifying the causes and consequences of assembly gaps using a multiplatform genome assembly of a bird-of-paradise. *Mol. Ecol. Resour.* **21**, 263–286 (2021).
13. Gelabert, P. *et al.* Evolutionary History, Genomic Adaptation to Toxic Diet, and Extinction of the Carolina Parakeet. *Curr. Biol.* **30**, 108–114 (2020).
14. Zhang, G. *et al.* Comparative genomics reveals insights into avian genome evolution and adaptation. *Science (80- )*. **346**, 1311–1320 (2014).
